# Supplementary material
Source: MDPI journal article supplement (https://www.mdpi.com/2673-7655/2/1/6)
Supplement: s1 [file s1]

Supplementary (appendix) Figures:

Table S1: Logistic fit models for emergence and normalized emergence based on year, cover crop system, seed size, and hybrid.

| Treatments |           |      |        | Emergence                                 |                        |                        | Normalized Emergence                      |                        |                        |
|------------|-----------|------|--------|-------------------------------------------|------------------------|------------------------|-------------------------------------------|------------------------|------------------------|
| Year       | Cover     | Size | Hybrid | Logistic Fit Model                        | Approx. R <sup>2</sup> | Std. Error of Estimate | Logistic Fit Model                        | Approx. R <sup>2</sup> | Std. Error of Estimate |
| 2019       | Bare Soil |      |        | 1206.6 /<br>(1+48.4563*EXP(-0.77*plants)) | 0.9989                 | 2.72                   | 1169.3 /<br>(1+24.3258*EXP(-1.16*plants)) | 0.9993                 | 2.35                   |
| 2019       | KBG       |      |        | 1323 /<br>(1+21.6821*EXP(-0.67*plants))   | 0.9990                 | 2.69                   | 1261.5 /<br>(1+13.4098*EXP(-1.13*plants)) | 0.9998                 | 1.33                   |
| 2020       | Bare Soil |      |        | 1096.3 /<br>(1+24.677*EXP(-1.19*plants))  | 0.9986                 | 4.46                   | 1094.7 /<br>(1+21.5754*EXP(-1.42*plants)) | 0.9992                 | 3.50                   |
| 2020       | KBG       |      |        | 940.1 /<br>(1+26.1533*EXP(-0.57*plants))  | 0.9972                 | 4.76                   | 937.8 /<br>(1+19.8747*EXP(-0.59*plants))  | 0.9971                 | 5.00                   |
| 2019       | Bare Soil | IB   |        | 629.8 /<br>(1+46.7091*EXP(-0.79*plants))  | 0.9990                 | 1.97                   | 612.4 /<br>(1+22.1036*EXP(-1.18*plants))  | 0.9994                 | 1.47                   |
| 2019       | Bare Soil | SD   |        | 577.4 /<br>(1+52.8703*EXP(-0.75*plants))  | 0.9987                 | 1.95                   | 557.1 /<br>(1+27.7324*EXP(-1.14*plants))  | 0.9987                 | 1.87                   |
| 2019       | KBG       | IB   |        | 657.2 /<br>(1+24.9036*EXP(-0.71*plants))  | 0.9987                 | 1.90                   | 629.3 /<br>(1+13.3488*EXP(-1.15*plants))  | 0.9997                 | 0.91                   |

|    |      |    |      |                        |       |      |                  |       |      |
|----|------|----|------|------------------------|-------|------|------------------|-------|------|
| 20 |      |    |      | 666.4 /                |       |      | 632.1 /          |       |      |
| 19 | KBG  | SD |      | (1+18.9674*EXP(-       | 0.998 |      | (1+13.5445*EXP(- | 0.999 |      |
|    |      |    |      | 0.64*plants)           | 9     | 1.86 | 1.1*plants)      | 7     | 0.98 |
|    |      |    |      | 519.5 /                |       |      | 519.5 /          |       |      |
| 20 | Bare |    |      | (1+32.5031*EXP(-       | 0.998 |      | (1+24.0422*EXP(- | 0.999 |      |
| 20 | Soil | IB |      | 1.29*plants)           | 4     | 2.85 | 1.45*plants)     | 3     | 2.01 |
|    |      |    |      | 571.4 /                |       |      | 569.5 /          |       |      |
| 20 | Bare |    |      | (1+20.5892*EXP(-       | 0.998 |      | (1+20.9481*EXP(- | 0.998 |      |
| 20 | Soil | SD |      | 1.14*plants)           | 2     | 3.35 | 1.43*plants)     | 8     | 2.73 |
|    |      |    |      | 481.6 /                |       |      | 477.4 /          |       |      |
| 20 |      |    |      | (1+23.1278*EXP(-       | 0.998 |      | (1+20.8382*EXP(- | 0.997 |      |
| 20 | KBG  | IB |      | 0.51*plants)           | 1     | 2.76 | 0.54*plants)     | 5     | 3.21 |
|    |      |    |      | 464.7 /                |       |      | 459.8 /          |       |      |
| 20 |      |    |      | (1+24.5399*EXP(-       | 0.997 |      | (1+21.661*EXP(-  | 0.997 |      |
| 20 | KBG  | SD |      | 0.6*plants)            | 5     | 3.27 | 0.66*plants)     | 0     | 3.65 |
|    |      |    |      | 323.8 /                |       |      | 311.1 /          |       |      |
| 20 | Bare |    | 7016 | (1+36.5021*EXP(-       | 0.998 |      | (1+19.085*EXP(-  | 0.999 |      |
| 19 | Soil | IB | CNV  | 0.82*plants)           | 1     | 2.00 | 1.4*plants)      | 6     | 0.97 |
|    |      |    |      | 310.3 /                |       |      | 301.4 /          |       |      |
| 20 | Bare |    |      | (1+70.7619*EXP(-       | 0.999 |      | (1+43.7522*EXP(- | 0.999 |      |
| 19 | Soil | IB | 1197 | 0.79*plants)           | 1     | 1.22 | 1.19*plants)     | 3     | 1.00 |
|    |      |    |      |                        |       |      | 254.3 /          |       |      |
| 20 | Bare |    | 7016 | 268 / (1+40.9164*EXP(- | 0.996 |      | (1+26.2057*EXP(- | 0.998 |      |
| 19 | Soil | SD | CNV  | 0.77*plants)           | 9     | 2.18 | 1.46*plants)     | 2     | 1.58 |
|    |      |    |      | 318.2 /                |       |      | 299.7 /          |       |      |
| 20 | Bare |    |      | (1+68.2636*EXP(-       | 0.998 |      | (1+70.5578*EXP(- | 0.999 |      |
| 19 | Soil | SD | 1197 | 0.72*plants)           | 6     | 1.29 | 1.23*plants)     | 3     | 0.96 |
|    |      |    |      | 327.6 /                |       |      | 311.2 /          |       |      |
| 20 |      |    | 7016 | (1+20.7315*EXP(-       | 0.997 |      | (1+7.8159*EXP(-  | 0.999 |      |
| 19 | KBG  | IB | CNV  | 0.74*plants)           | 4     | 1.74 | 1.22*plants)     | 7     | 0.50 |

|    |      |    |      |                        |       |      |                  |       |      |
|----|------|----|------|------------------------|-------|------|------------------|-------|------|
| 20 |      |    |      | 339.4 /                |       |      | 316.3 /          |       |      |
| 19 | KBG  | IB | 1197 | (1+31.9274*EXP(-       | 0.998 |      | (1+34.4065*EXP(- | 0.999 |      |
|    |      |    |      | 0.68*plants)           | 1     | 1.64 | 1.28*plants)     | 2     | 0.99 |
| 20 |      |    | 7016 | 342.4 /                |       |      | 328.8 /          |       |      |
| 19 | KBG  | SD | CNV  | (1+17.0864*EXP(-       | 0.998 |      | (1+10.9194*EXP(- | 0.999 |      |
|    |      |    |      | 0.69*plants)           | 9     | 1.42 | 1.15*plants)     | 7     | 0.68 |
| 20 |      |    |      | 326.2 /                |       |      | 302.8 /          |       |      |
| 19 | KBG  | SD | 1197 | (1+24.0171*EXP(-       | 0.998 |      | (1+19.4747*EXP(- | 0.999 |      |
|    |      |    |      | 0.62*plants)           | 4     | 1.50 | 1.11*plants)     | 4     | 0.96 |
| 20 | Bare |    | 7016 | 226 / (1+17.8446*EXP(- | 0.999 |      | 223.9 /          |       |      |
| 20 | Soil | IB | CNV  | 1.05*plants)           | 8     | 0.66 | (1+25.2854*EXP(- | 0.998 |      |
|    |      |    |      | 295.2 /                |       |      | 1.43*plants)     | 9     | 1.54 |
| 20 | Bare |    |      | (1+31.185*EXP(-        | 0.997 |      | 295.7 /          |       |      |
| 20 | Soil | IB | 1197 | 1.31*plants)           | 8     | 2.27 | (1+23.1542*EXP(- | 0.999 |      |
|    |      |    |      | 276.3 /                |       |      | 1.47*plants)     | 1     | 1.34 |
| 20 | Bare |    | 7016 | (1+19.1344*EXP(-       | 0.998 |      | 275.6 /          |       |      |
| 20 | Soil | SD | CNV  | 1.01*plants)           | 0     | 2.14 | (1+17.9567*EXP(- | 0.998 |      |
|    |      |    |      | 295.8 /                |       |      | 1.2*plants)      | 8     | 1.82 |
| 20 | Bare |    |      | (1+23.9289*EXP(-       | 0.997 |      | 292.8 /          |       |      |
| 20 | Soil | SD | 1197 | 1.31*plants)           | 2     | 2.63 | (1+33.5561*EXP(- | 0.998 |      |
|    |      |    |      | 206.5 /                |       |      | 1.85*plants)     | 6     | 1.70 |
| 20 |      |    | 7016 | (1+19.6617*EXP(-       | 0.998 |      | 203.8 /          |       |      |
| 20 | KBG  | IB | CNV  | 0.55*plants)           | 7     | 1.49 | (1+19.3409*EXP(- | 0.997 |      |
|    |      |    |      | 272.5 /                |       |      | 0.62*plants)     | 6     | 2.08 |
| 20 |      |    |      | (1+29.9519*EXP(-       | 0.997 |      | 273.1 /          |       |      |
| 20 | KBG  | IB | 1197 | 0.51*plants)           | 4     | 2.32 | (1+22.8364*EXP(- | 0.997 |      |
|    |      |    |      | 199.9 /                |       |      | 0.51*plants)     | 9     | 2.15 |
| 20 |      |    | 7016 | (1+25.9039*EXP(-       | 0.996 |      | 197.8 /          |       |      |
| 20 | KBG  | SD | CNV  | 0.63*plants)           | 9     | 2.41 | (1+20.5905*EXP(- | 0.996 |      |
|    |      |    |      |                        |       |      | 0.68*plants)     | 2     | 2.73 |

|    |     |    |      |                  |       |      |  |                        |       |      |
|----|-----|----|------|------------------|-------|------|--|------------------------|-------|------|
| 20 |     |    |      | 264.8 /          |       |      |  |                        |       |      |
| 20 | KBG | SD | 1197 | (1+23.8984*EXP(- | 0.997 |      |  | 269 / (1+20.2251*EXP(- | 0.995 |      |
|    |     |    |      | 0.59*plants)     | 8     | 2.32 |  | 0.61*plants)           | 9     | 3.41 |

Table S2: Logistic fit models for emergence based on planting depth, year, and cover crop systems.

| Year | Cover | Depth | Logistic Fit Model                   | Approx. R <sup>2</sup> | Std. Error of Estimate |
|------|-------|-------|--------------------------------------|------------------------|------------------------|
|      | Bare  | 3.15  |                                      |                        |                        |
| 2019 | Soil  | cm    | 575.6 / (1+34.5443*EXP(-1.05*plants) | 0.9975                 | 2.48                   |
|      | Bare  | 6.30  |                                      |                        |                        |
| 2019 | Soil  | cm    | 598 / (1+11308.6*EXP(-1.49*plants)   | 0.9994                 | 1.11                   |
|      |       | 3.15  |                                      |                        |                        |
| 2019 | KBG   | cm    | 657.8 / (1+14.7432*EXP(-0.99*plants) | 0.9994                 | 1.46                   |
|      |       | 6.30  |                                      |                        |                        |
| 2019 | KBG   | cm    | 605.5 / (1+8160*EXP(-1.51*plants)    | 0.9992                 | 1.41                   |
|      | Bare  | 3.15  |                                      |                        |                        |
| 2020 | Soil  | cm    | 79.1369 / (1+2.2716*EXP(-0*plants)   | 0.9977                 | 3.71                   |
|      | Bare  | 6.30  |                                      |                        |                        |
| 2020 | Soil  | cm    | 66.8831 / (1+1.2464*EXP(-0*plants)   | 0.9992                 | 2.22                   |
|      |       | 3.15  |                                      |                        |                        |
| 2020 | KBG   | cm    | 12.352 / (1+0.4881*EXP(-0*plants)    | 0.9943                 | 4.65                   |
|      |       | 6.30  |                                      |                        |                        |
| 2020 | KBG   | cm    | 66.8896 / (1+0.6909*EXP(-0*plants)   | 0.9979                 | 3.07                   |
